# Supplementary material
Source: HighWire-hosted journal article supplement (https://bjo.bmj.com/content/101/7/909)
Supplement: inline-supplementary-material-2 [file inline-supplementary-material-2.pdf]

**Supplementary File 2. Bilateral keratoplasty outcomes.**

| <b>Subject MPS Type</b> | <b>Age at K (Years)</b> | <b>Pre-K BCVA</b> | <b>Post-K BCVA</b> | <b>Follow up Time in Months</b> | <b>Rejection Episodes</b> |
|-------------------------|-------------------------|-------------------|--------------------|---------------------------------|---------------------------|
| <b>IH</b>               | 26.8                    | 0.50 (20/60)      | 0.30 (20/40)       | 52                              | 0                         |
|                         | 27.2                    | 0.60 (20/80)      | 0.40 (20/50)       | 39                              | 0                         |
| <b>IH</b>               | 14 (DALK)               | 1.00 (20/200)     | 0.30 (20/40)       | 26                              | 0                         |
|                         | 15 (DALK)               | 1.30 (20/400)     | 0.10 (20/25)       | 38                              | 0                         |
| <b>IH/S</b>             | 26                      | 3.00 (HM)         | 3.00 (HM)          | 79                              | 0                         |
|                         | 28                      | 3.00 (HM)         | 3.00 (HM)          | 54                              | 1                         |
| <b>IH/S</b>             | 24                      | 2.00 (CF)         | 0.18 (20/30)       | 56                              | 4                         |
|                         | 27                      | 3.00 (HM)         | 0.18 (20/30)       | 23                              | 1                         |
| <b>IH/S</b>             | 8                       | NR                | LP                 | 90                              | 0                         |
|                         | 12                      | NR                | LP                 | 120                             | 0                         |
| <b>IH/S</b>             | 26                      | 3.00 (HM)         | 3.00 (HM)          | 120                             | 0                         |
|                         | 29                      | 3.00 (HM)         | 3.00 (HM)          | 84                              | 0                         |
| <b>IS</b>               | 25.3                    | 2.00 (CF)         | 0.70 (20/100)      | 196                             | 3                         |
|                         | 27.6                    | 2.00 (CF)         | 0.70 (20/100)      | 157                             | 0                         |
| <b>IS</b>               | 24                      | NR                | 0.10 (20/25)       | 96                              | 0                         |
|                         | 26 (DALK)               | NR                | 0.10 (20/25)       | 80                              | 0                         |
| <b>IS</b>               | 35                      | NR                | 0.30 (20/40)       | 156                             | 0                         |
|                         | 38                      | NR                | 0.30 (20/40)       | 120                             | 0                         |
| <b>IS</b>               | 31                      | 0.60 (20/80)      | 0.10 (20/25)       | 106                             | 3                         |
|                         | 32                      | 0.60 (20/80)      | 0.20 (20/30)       | 94                              | 0                         |
| <b>IV</b>               | 52                      | 1.16 (20/280)     | 0.10 (20/25)       | 132                             | 0                         |
|                         | 60.1                    | 1.30 (20/400)     | 0.10 (20/25)       | 31                              | 0                         |
| <b>IV</b>               | 63.3                    | NR                | 0.30 (20/40)       | 83                              | 0                         |
|                         | 65.3                    | 1.30 (20/400)     | 0.40 (20/50)       | 59                              | 0                         |
| <b>VI</b>               | 16                      | LP                | LP                 | 63                              | 0                         |
|                         | 16                      | LP                | LP                 | 63                              | 0                         |
| <b>VI</b>               | 21                      | 3.00 (HM)         | 3.00 (HM)          | 55                              | 0                         |
|                         | 21                      | 3.00 (HM)         | 3.00 (HM)          | 55                              | 0                         |
| <b>VI</b>               | 14                      | LP                | LP                 | 61                              | Reopacified               |
|                         | 14                      | LP                | LP                 | 61                              | Reopacified               |
| <b>VI</b>               | 24.4                    | 0.30 (20/40)      | 0.40 (20/50)       | 91                              | 1                         |
|                         | 28.2                    | 0.70 (20/100)     | 0.30 (20/40)       | 46                              | 1                         |

Abbreviations: K, keratoplasty; Pre-K, Pre-keratoplasty; BCVA, best corrected visual acuity; MPS IH, Hurler Syndrome; MPS IH/S, Hurler-Scheie Syndrome; MPS IS, Scheie Syndrome; MPS IV, Morquio Syndrome; MPS VI, Maroteaux-Lamy Syndrome, DALK, deep anterior lamellar keratoplasty; PK, penetrating keratoplasty; LP, light perception; HM, hand motion; CF, count fingers; NR, not recorded.
